# Supplementary material for: A new metrics framework for quantifying and intercomparing atmospheric rivers in observations, reanalyses, and climate models
Source: Copernicus journal article supplement (doi:10.5194/gmd-18-961-2025), 2025-02-20
Supplement: Supplementary file 1 [file gmd-18-961-2025-supplement.pdf]

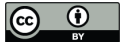

*Supplement of*

## **A new metrics framework for quantifying and intercomparing atmospheric rivers in observations, reanalyses, and climate models**

**Bo Dong et al.**

*Correspondence to:* Bo Dong (dong12@llnl.gov)

The copyright of individual parts of the supplement might differ from the article licence.

## supplementary material

Table S1. List of climate models used in this study and their horizontal resolution.

Table S2. Grids info for E3SM LR and HR model

Table S3 Lat-lon boundary for the geographic regions in Fig. 1

Table S4. Effective sample size ( $N_e$ ) for the spatial pattern correlation of AR frequency for each ocean basin.

Fig. S1. AR frequency in the South Pacific for (a) BCC-CSM2-MR, (b) ERA5 and their difference (c) as (a) - (b). AR frequency in the North Atlantic for (d) CSIRO-MK3-6-0, (e) ERA5 and their difference (f) as (d) - (e)

Fig. S2. Time slice of AR tags detected using TE algorithm on (a) ERA5 and (b) BCC-CSM2-MR data on 1979-01-01T00

Fig. S3. Same as Fig. S2 but for AR tags detected by (a) ARCONNECT (Atmospheric River-CONNected objECT; Shearer et al. 2020), (b) TECA-BARD (Toolkit for Extreme Climate Analysis; O'Brien, Risser, et al., 2020), (c) Mundhenk and (d) Lora detection method.

Fig. S4. Time slice of AR tags detected using TE algorithm on (a) E3SM-LR and (b) E3SM-HR data on 1984-01-01T00

Fig. S5. AR frequency over global oceans for CMIP5 and CMIP6 models used in this study.

Table S1. List of climate models used in this study and their horizontal resolution.

| Institute           | model name    | horizontal resolution |
|---------------------|---------------|-----------------------|
| NCAR, United States | CCSM4         | 1.25° X 0.938°        |
| IPSL, France        | IPSL-CM5A-LR  | 3.75° X 1.875°        |
| IPSL, France        | IPSL-CM5B-LR  | 3.75° X 1.875°        |
| CCCma, Canada       | CanESM2       | 2.8° X 2.9°           |
| CSIRO, Australia    | CSIRO-MK3-6-0 | 1.9°X1. 9°            |
| BCCR, Norway        | NorESM1-M     | 2° X 2°               |
| BCC, China          | BCC-CSM2-MR   | 1.125° X 1.125°       |
| MRI, Japan          | MRI-ESM2-0    | 1.125° X 1.125°       |

Table S2. Grids info for E3SM LR and HR model

| model   | Spatial resolution | # of columns | Vertical levels |
|---------|--------------------|--------------|-----------------|
| E3SM-LR | 110km              | 48,602       | 72              |
| E3SM-HR | 25km               | 777,602      | 72              |

Table S3. Lat-lon boundaries for geographic regions in Fig. 1

| <b>Region</b>   | S. Africa            | Australia                | New Zealand            | S. America           | Alaska               | California           | Baja                 | N. Europe               | UK                      | Europe                    |
|-----------------|----------------------|--------------------------|------------------------|----------------------|----------------------|----------------------|----------------------|-------------------------|-------------------------|---------------------------|
| <b>Boundary</b> | 21-35.5°S<br>11-20°E | 23-35.5°S<br>112.8-120°E | 34-46.5°S<br>166-179°E | 30-56°S<br>68-76°W   | 42-51°N<br>119-126°W | 34-42°N<br>119-126°W | 20-34°N<br>105-119°W | 53-70°N<br>3.5-20°E     | 49.8-60°N<br>10°W - 2°E | 35-49.8°N<br>10°W - 3.5°E |
| <b>Region</b>   | W. Africa            | Greenland                | Antarctica             | E. Asia              | Pacific NW           | N. Pacific           | S. Pacific           | N. Atlantic             | S. Atlantic             | Indian Ocean              |
| <b>Boundary</b> | 10-35°N<br>5-19°W    | 59.5- 67°N<br>40-52°W    | 60-76°S<br>57-95°W     | 31-43°N<br>125-142°E | 42-51°N<br>119-126°W | 0-67°N<br>99°E-98°W  | 0-70°S<br>142°E-70°W | 0-75°N<br>80°W-<br>10°E | 0-70°S<br>70°W-20°E     | 0-70°S<br>30-120°E        |

Table S4. Effective sample size ( $N_e$ ) for the spatial pattern correlation of AR frequency for each ocean basin

|                         | <b>N. Pacific</b> | <b>S. Pacific</b> | <b>N. Atlantic</b> | <b>S. Atlantic</b> | <b>Indian Ocean</b> |
|-------------------------|-------------------|-------------------|--------------------|--------------------|---------------------|
| <b><math>N_e</math></b> | 16                | 27                | 14                 | 15                 | 19                  |

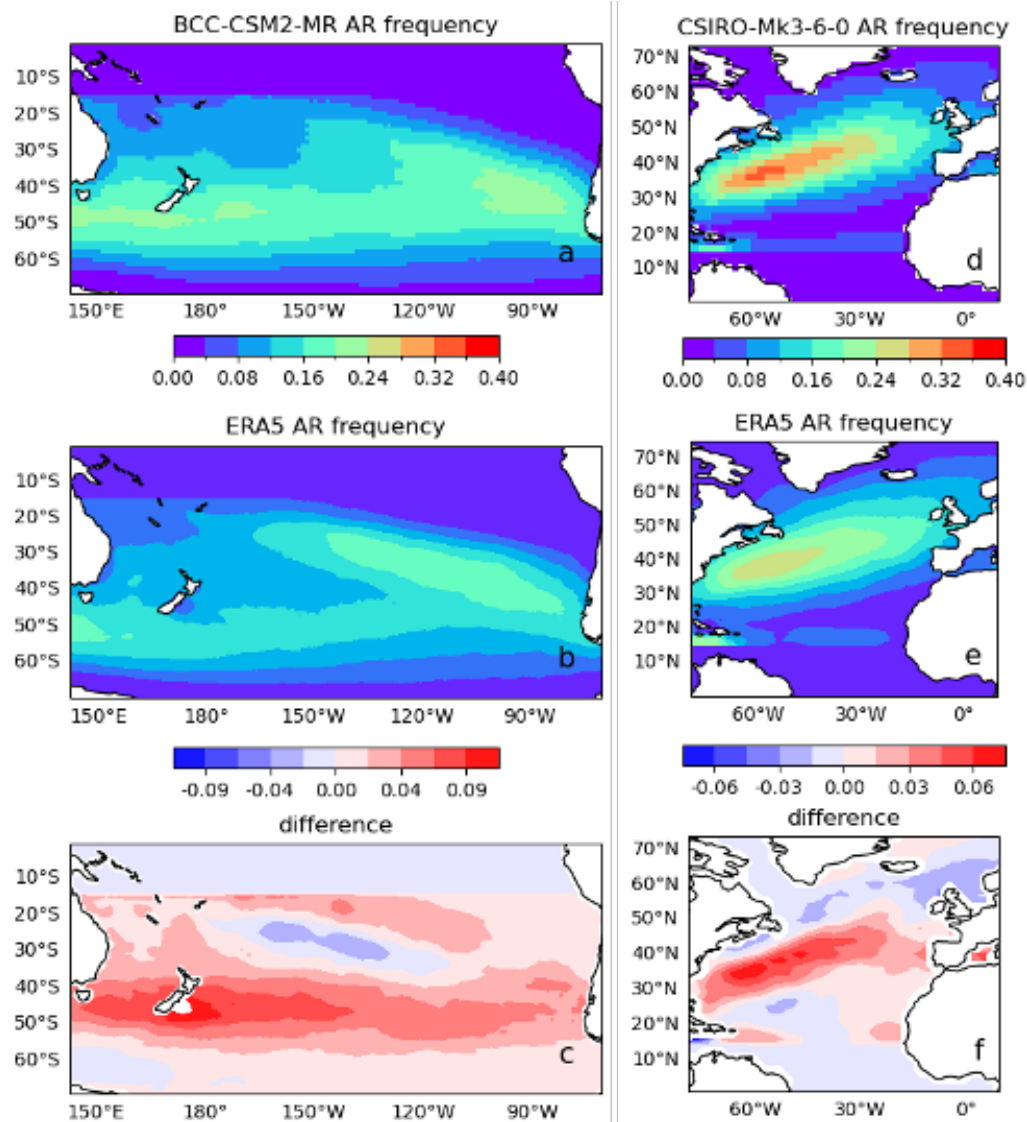

Fig. S1. AR frequency in the South Pacific for (a) BCC-CSM2-MR, (b) ERA5 and their difference (c) as (a) - (b). AR frequency in the North Atlantic for (d) CSIRO-MK3-6-0, (e) ERA5 and their difference (f) as (d) - (e).



ERA5 1979-01-01T00

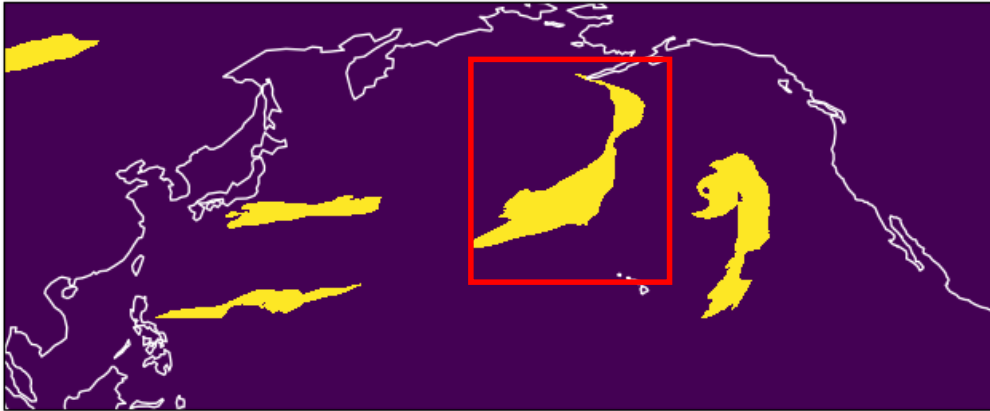

BCC 1979-01-01T00

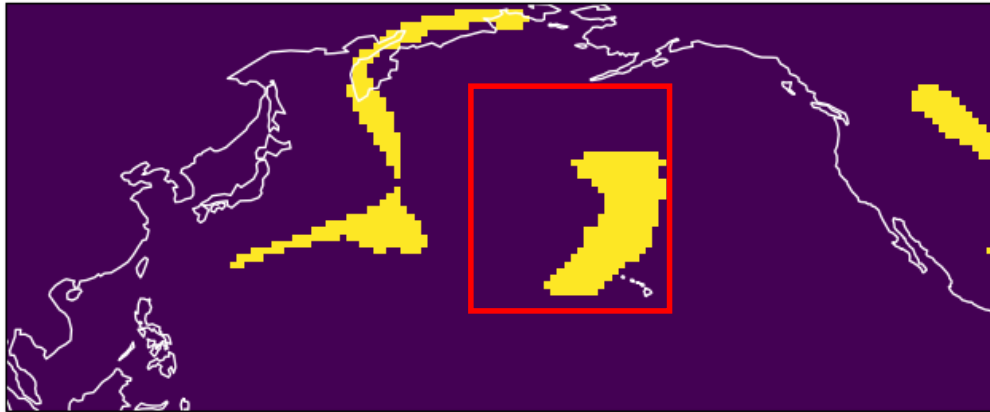

Fig. S2. Time slice of AR tags detected using TE algorithm on (a) ERA5 and (b) BCC-CSM2 data on 1979-01-01T00



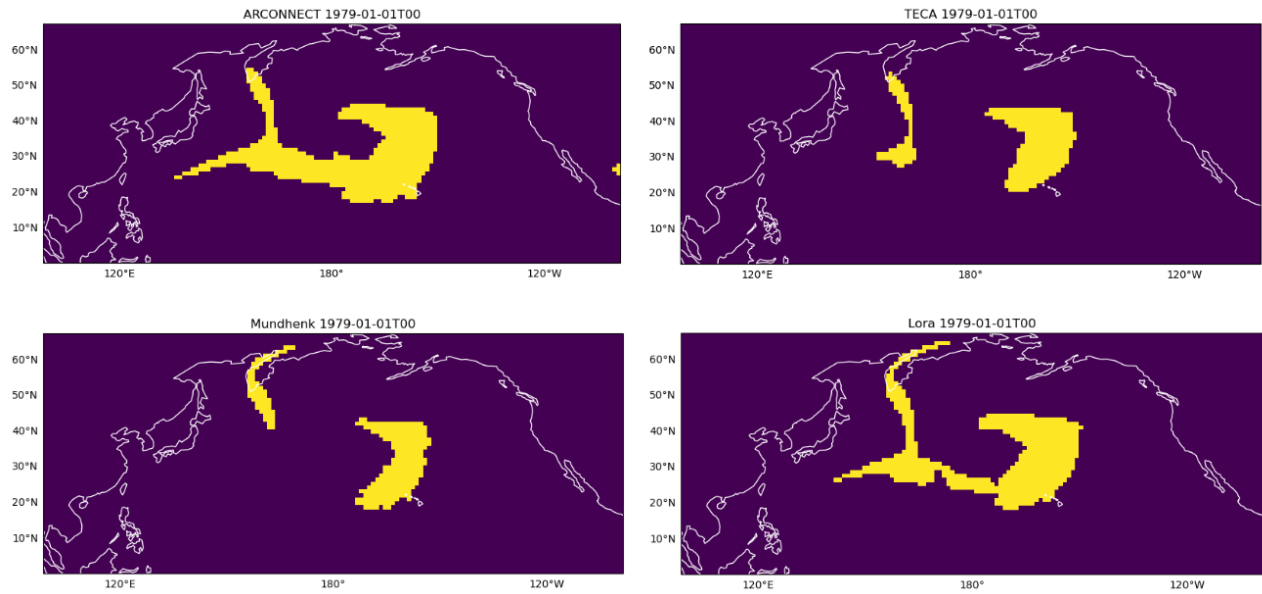

Fig. S3. Same as Fig. S2 but for AR tags detected by (a) ARCONNECT (Atmospheric River-CONNECTed objECT; Shearer et al. 2020), (b) TECA-BARD (Toolkit for Extreme Climate Analysis; O'Brien, Risser, et al., 2020), (c) Mundhenk and (d) Lora detection method.

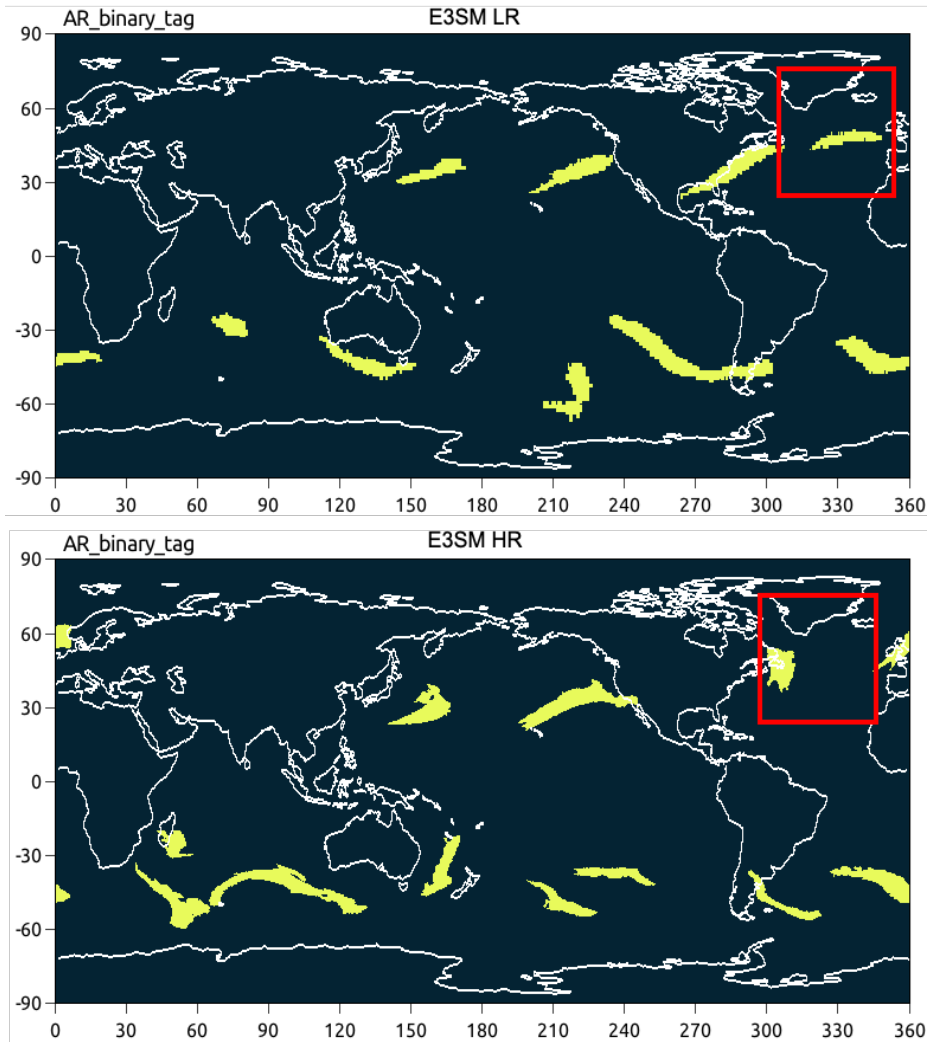

Fig. S4. Time slice of AR tags detected using TE algorithm on (a) E3SM-LR and (b) E3SM-HR data on 1984-01-01T00

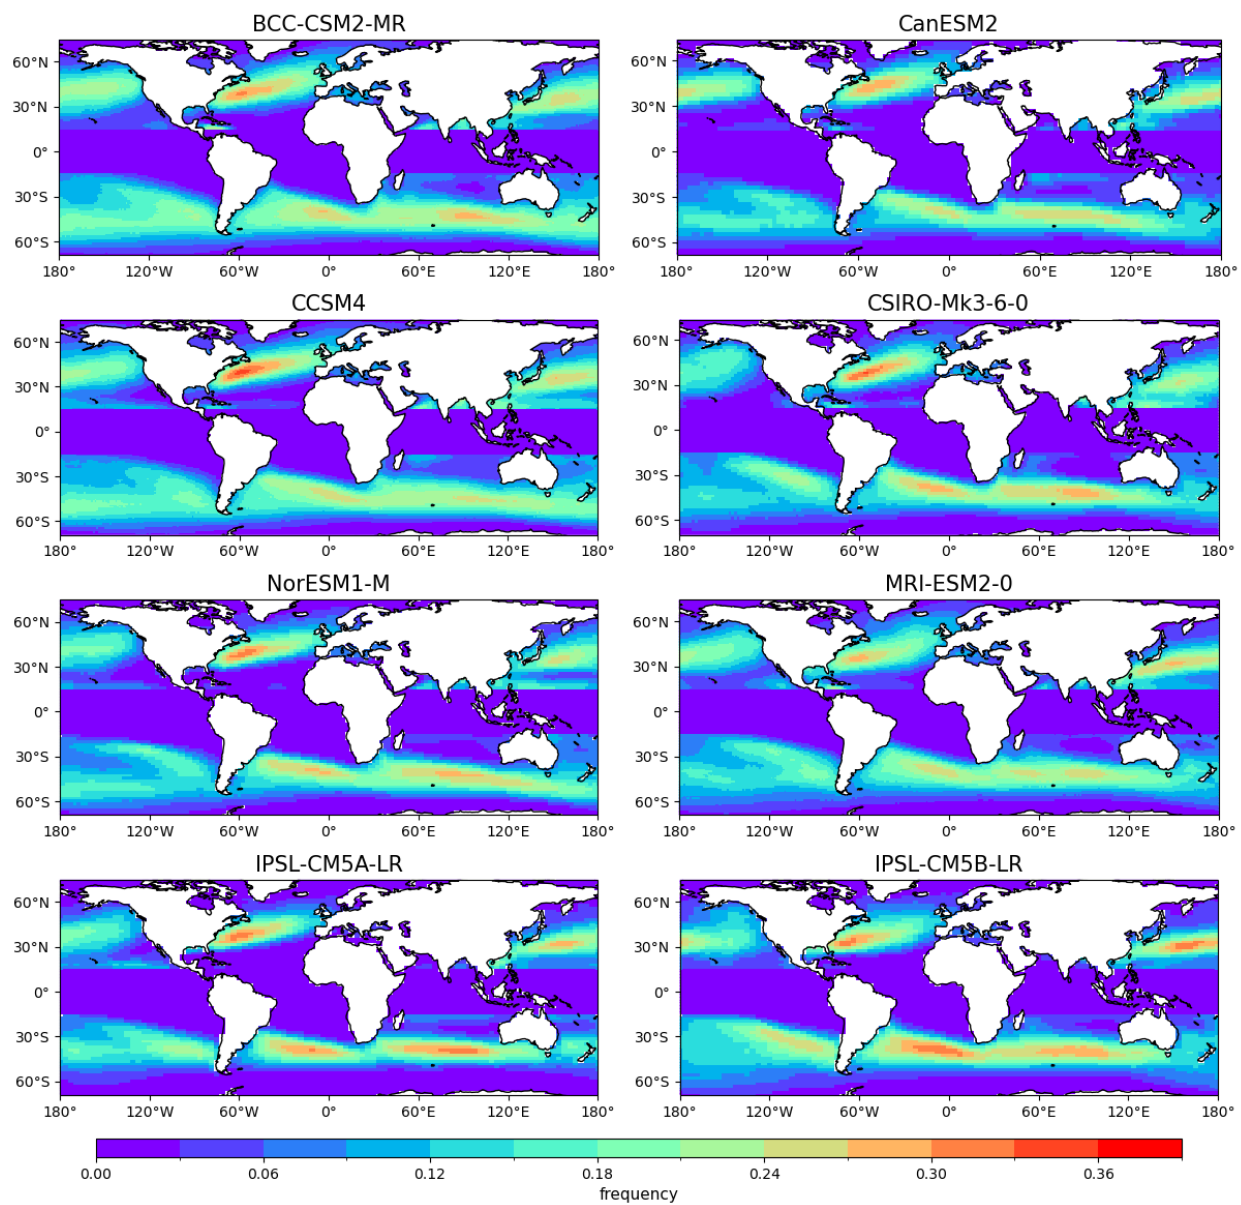

Fig. S5. AR frequency over global oceans for CMIP5 and CMIP6 models used in this study.
